# Supplementary material
Source: PubMed Central journal article supplement (PMC5942526)
Supplement: Supplemental_Material_246.pdf [file Supplemental_Material_246.pdf]

**Supplementary Table 1. Allele frequencies of 161 SNPs examined**

| Chr | Associated Gene     | SNP        | Position  | EArep GWAS minor allele | EArep GWAS MAF | ASW minor allele | ASW MAF | Sample minor allele | Sample MAF |
|-----|---------------------|------------|-----------|-------------------------|----------------|------------------|---------|---------------------|------------|
| 1   | <i>ANGPTL1</i>      | rs4650994  | 178515312 | G                       | 0.49           | A                | 0.22    | A                   | 0.18       |
| 1   | <i>ANGPTL3</i>      | rs2131925  | 63025942  | G                       | 0.34           | G                | 0.34    | T                   | 0.35       |
| 1   | <i>ANXA9</i>        | rs267733   | 150958836 | G                       | 0.16           | G                | 0.09    | G                   | 0.06       |
| 1   | <i>ASAP3</i>        | rs1077514  | 23766233  | C                       | 0.15           | T                | 0.48    | C                   | 0.50       |
| 1   | <i>EVI5</i>         | rs7515577  | 93009438  | C                       | 0.23           | C                | 0.49    | C                   | 0.07       |
| 1   | <i>GALNT2</i>       | rs4846914  | 230295691 | G                       | 0.41           | A                | 0.20    | A                   | 0.13       |
| 1   | <i>HDGF-PMVK</i>    | rs12145743 | 156700651 | G                       | 0.34           | G                | 0.05    | G                   | 0.06       |
| 1   | <i>IRF2BP2</i>      | rs514230   | 234858597 | A                       | 0.48           | A                | 0.22    | A                   | 0.24       |
| 1   | <i>LDLRAP1</i>      | rs12027135 | 25775733  | A                       | 0.46           | T                | 0.49    | T                   | 0.47       |
| 1   | <i>MARCI</i>        | rs2642442  | 220973563 | C                       | 0.33           | C                | 0.25    | C                   | 0.22       |
| 1   | <i>PABPC4</i>       | rs4660293  | 40028180  | G                       | 0.24           | G                | 0.07    | G                   | 0.05       |
| 1   | <i>PCSK9</i>        | rs2479409  | 55504650  | G                       | .032           | G                | 0.32    | G                   | 0.25       |
| 1   | <i>PIGV-NROB2</i>   | rs12748152 | 27138393  | T                       | 0.09           | T                | 0.00    | T                   | 0.02       |
| 1   | <i>SORT1</i>        | rs629301   | 109818306 | G                       | 0.24           | G                | 0.42    | G                   | 0.36       |
| 1   | <i>ZNF648</i>       | rs1689800  | 182168885 | G                       | 0.35           | G                | 0.28    | G                   | 0.34       |
| 2   | <i>ABCB11</i>       | rs2287623  | 169830155 | G                       | 0.41           | G                | 0.41    | G                   | 0.42       |
| 2   | <i>ABCG8</i>        | rs4299376  | 44072576  | G                       | 0.31           | G                | 0.14    | G                   | 0.15       |
| 2   | <i>APOB</i>         | rs1042034  | 21225281  | C                       | N/A            | C                | 0.16    | C                   | 0.16       |
| 2   | <i>APOB</i>         | rs1367117  | 21263900  | A                       | 0.32           | A                | 0.17    | A                   | 0.10       |
| 2   | <i>COBLL1</i>       | rs10195252 | 165513091 | C                       | 0.41           | T                | 0.25    | T                   | 0.24       |
| 2   | <i>COBLL1</i>       | rs12328675 | 165540800 | C                       | N/A            | C                | 0.20    | C                   | 0.16       |
| 2   | <i>CPS1</i>         | rs1047891  | 211540507 | A                       | 0.33           | A                | 0.39    | A                   | 0.35       |
| 2   | <i>EHBPI</i>        | rs2710642  | 63149557  | G                       | 0.35           | G                | 0.19    | G                   | 0.14       |
| 2   | <i>FAM117B</i>      | rs11694172 | 203532304 | G                       | 0.25           | G                | 0.06    | G                   | 0.06       |
| 2   | <i>FNI</i>          | rs1250229  | 216304384 | T                       | 0.27           | T                | 0.17    | T                   | 0.19       |
| 2   | <i>GCKR</i>         | rs1260326  | 27730940  | T                       | 0.39           | T                | 0.10    | T                   | 0.15       |
| 2   | <i>INSIG2</i>       | rs10490626 | 118835841 | A                       | 0.08           | A                | 0.00    | A                   | 0.01       |
| 2   | <i>IRS1</i>         | rs2972146  | 227100698 | G                       | 0.37           | G                | 0.16    | G                   | 0.17       |
| 2   | <i>LOC105373585</i> | rs2030746  | 121309488 | T                       | 0.4            | T                | 0.41    | C                   | 0.45       |
| 2   | <i>RAB3GAP1</i>     | rs7570971  | 135837906 | A                       | 0.35           | C                | 0.16    | C                   | 0.13       |
| 2   | <i>UGT1A1</i>       | rs11563251 | 234679384 | T                       | 0.12           | T                | 0.3     | T                   | 0.37       |
| 3   | <i>ACAD11</i>       | rs17404153 | 132163200 | T                       | 0.14           | T                | 0.04    | T                   | 0.03       |
| 3   | <i>ATG7</i>         | rs2606736  | 11400249  | C                       | 0.39           | T                | 0.33    | T                   | 0.41       |
| 3   | <i>CMTM6</i>        | rs7640978  | 32533010  | T                       | 0.09           | T                | 0.25    | T                   | 0.29       |
| 3   | <i>GSK3B</i>        | rs6805251  | 119560606 | T                       | 0.39           | C                | 0.16    | C                   | 0.12       |
| 3   | <i>MSL2</i>         | rs645040   | 135926622 | G                       | 0.23           | G                | 0.26    | G                   | 0.30       |
| 3   | <i>PXK</i>          | rs13315871 | 58381287  | A                       | 0.1            | A                | 0.07    | A                   | 0.04       |
| 3   | <i>RAF1</i>         | rs2290159  | 12628920  | C                       | 0.23           | C                | 0.28    | C                   | 0.28       |
| 3   | <i>RBM5</i>         | rs2013208  | 50129399  | T                       | 0.5            | C                | 0.47    | C                   | 0.41       |
| 3   | <i>SETD2</i>        | rs2290547  | 47061183  | A                       | 0.2            | A                | 0.06    | A                   | 0.04       |
| 3   | <i>STAB1</i>        | rs13326165 | 52532118  | A                       | 0.21           | A                | 0.37    | A                   | 0.34       |
| 4   | <i>ADH5</i>         | rs2602836  | 100014805 | A                       | 0.44           | G                | 0.29    | G                   | 0.33       |
| 4   | <i>FAM13A</i>       | rs3822072  | 89741269  | A                       | 0.46           | G                | 0.43    | G                   | 0.46       |
| 4   | <i>KLHL8</i>        | rs442177   | 88030261  | G                       | 0.42           | G                | 0.50    | G                   | 0.50       |
| 4   | <i>LRPAP1</i>       | rs6831256  | 3473139   | G                       | 0.42           | A                | 0.33    | A                   | 0.36       |
| 4   | <i>SLC39A8</i>      | rs13107325 | 103188709 | T                       | 0.08           | T                | 0.02    | T                   | 0.01       |
| 4   | <i>SMIM20</i>       | rs10019888 | 26062990  | G                       | 0.18           | G                | 0.25    | G                   | 0.23       |
| 5   | <i>ARL15</i>        | rs6450176  | 53298025  | A                       | 0.26           | A                | 0.29    | A                   | 0.29       |

|    |                 |            |           |   |      |   |      |   |      |
|----|-----------------|------------|-----------|---|------|---|------|---|------|
| 5  | <i>CSNK1G3</i>  | rs4530754  | 122855416 | G | 0.46 | G | 0.27 | G | 0.22 |
| 5  | <i>HMGCR</i>    | rs12916    | 74656539  | C | 0.4  | C | 0.28 | C | 0.23 |
| 5  | <i>MAP3K1</i>   | rs9686661  | 55861786  | T | 0.2  | T | 0.29 | T | 0.25 |
| 5  | <i>TIMD4</i>    | rs6882076  | 156390297 | T | 0.36 | C | 0.38 | C | 0.38 |
| 6  | <i>C6orf106</i> | rs2814944  | 34552797  | T | 0.12 | T | 0.26 | A | 0.30 |
| 6  | <i>C6orf106</i> | rs2814982  | 34546560  | T | N/A  | T | 0.23 | T | 0.30 |
| 6  | <i>CITED2</i>   | rs605066   | 139829666 | C | 0.42 | T | 0.41 | T | 0.45 |
| 6  | <i>FRK</i>      | rs9488822  | 116312893 | T | 0.36 | T | 0.38 | T | 0.35 |
| 6  | <i>HBS1L</i>    | rs9376090  | 135411228 | C | 0.28 | C | 0.08 | C | 0.04 |
| 6  | <i>HFE</i>      | rs1800562  | 26093141  | A | 0.07 | A | 0.02 | A | 0.01 |
| 6  | <i>HLA-DRA</i>  | rs3177928  | 32412435  | A | 0.17 | A | 0.13 | A | 0.10 |
| 6  | <i>KCNK17</i>   | rs2758886  | 39250837  | A | 0.3  | A | 0.21 | A | 0.16 |
| 6  | <i>LPA</i>      | rs1564348  | 160578860 | C | 0.18 | C | 0.09 | C | 0.11 |
| 6  | <i>MYLIP</i>    | rs3757354  | 16127407  | T | 0.24 | T | 0.39 | T | 0.34 |
| 6  | <i>RSPO3</i>    | rs1936800  | 127436064 | C | 0.49 | C | 0.50 | C | 0.48 |
| 6  | <i>VEGFA</i>    | rs998584   | 43757896  | A | 0.49 | A | 0.27 | A | 0.22 |
| 7  | <i>DAGLB</i>    | rs702485   | 6449272   | G | 0.45 | A | 0.31 | A | 0.21 |
| 7  | <i>DNAH11</i>   | rs12670798 | 21607352  | C | 0.25 | C | 0.35 | C | 0.33 |
| 7  | <i>GPR146</i>   | rs1997243  | 1083777   | G | 0.16 | G | 0.02 | G | 0.03 |
| 7  | <i>IKZF1</i>    | rs4917014  | 50305863  | G | 0.32 | G | 0.08 | G | 0.08 |
| 7  | <i>KLF14</i>    | rs4731702  | 130433384 | T | 0.42 | T | 0.32 | T | 0.26 |
| 7  | <i>MET</i>      | rs38855    | 116358044 | G | 0.47 | G | 0.24 | G | 0.20 |
| 7  | <i>MIR148A</i>  | rs4722551  | 25991826  | C | 0.2  | C | 0.05 | C | 0.04 |
| 7  | <i>MLXIPL</i>   | rs17145738 | 72982874  | T | 0.13 | T | 0.07 | T | 0.09 |
| 7  | <i>NPC1L1</i>   | rs2072183  | 44579180  | C | 0.29 | C | 0.20 | C | 0.20 |
| 7  | <i>SNX13</i>    | rs4142995  | 17919258  | T | 0.38 | G | 0.30 | G | 0.30 |
| 7  | <i>TMEM176A</i> | rs17173637 | 150529449 | C | 0.12 | C | 0.06 | C | 0.06 |
| 7  | <i>TYWIB</i>    | rs13238203 | 72129667  | T | 0.04 | T | 0.01 | T | 0.01 |
| 8  | <i>CYP7A1</i>   | rs2081687  | 59388565  | T | 0.36 | T | 0.25 | T | 0.23 |
| 8  | <i>LPL</i>      | rs12678919 | 19844222  | G | 0.13 | G | 0.09 | G | 0.11 |
| 8  | <i>NAT2</i>     | rs1495741  | 18272881  | G | 0.26 | G | 0.33 | G | 0.39 |
| 8  | <i>PINX1</i>    | rs11776767 | 10683929  | C | 0.37 | G | 0.32 | G | 0.31 |
| 8  | <i>PLEC</i>     | rs11136341 | 145043543 | G | 0.4  | G | 0.39 | A | 0.50 |
| 8  | <i>PPP1R3B</i>  | rs9987289  | 9183358   | A | 0.1  | A | 0.20 | A | 0.17 |
| 8  | <i>SOX17</i>    | rs10102164 | 55421614  | A | 0.21 | A | 0.15 | A | 0.17 |
| 8  | <i>TRIB1</i>    | rs2954029  | 126490972 | T | 0.47 | T | 0.34 | T | 0.34 |
| 8  | <i>TRPS1</i>    | rs2293889  | 116599199 | T | 0.41 | T | 0.06 | T | 0.10 |
| 8  | <i>TRPS1</i>    | rs2737229  | 116648565 | C | N/A  | A | 0.20 | A | 0.17 |
| 9  | <i>ABCA1</i>    | rs1883025  | 107664301 | T | 0.25 | T | 0.38 | T | 0.34 |
| 9  | <i>TTC39B</i>   | rs581080   | 15305378  | G | 0.21 | G | 0.38 | C | 0.49 |
| 9  | <i>VLDLR</i>    | rs3780181  | 2640759   | G | 0.08 | G | 0.21 | G | 0.20 |
| 10 | <i>AKR1C4</i>   | rs1832007  | 5254847   | G | 0.18 | G | 0.04 | G | 0.03 |
| 10 | <i>CYP26A1</i>  | rs2068888  | 94839642  | A | 0.45 | A | 0.34 | A | 0.33 |
| 10 | <i>GPAM</i>     | rs2255141  | 113933886 | A | 0.3  | A | 0.07 | A | 0.08 |
| 10 | <i>JMJD1C</i>   | rs10761731 | 65027610  | T | 0.44 | T | 0.30 | T | 0.30 |
| 10 | <i>MARCH8</i>   | rs970548   | 46013277  | C | 0.26 | C | 0.22 | C | 0.22 |
| 10 | <i>VIM-AS1</i>  | rs10904908 | 17260290  | G | 0.43 | G | 0.34 | G | 0.36 |
| 11 | <i>AMPD3</i>    | rs2923084  | 10388782  | G | 0.18 | G | 0.48 | G | 0.47 |
| 11 | <i>APOA1</i>    | rs964184   | 116648917 | C | 0.84 | G | 0.22 | G | 0.22 |
| 11 | <i>FADS1</i>    | rs174546   | 61569830  | T | 0.36 | T | 0.11 | T | 0.07 |
| 11 | <i>KAT5</i>     | rs12801636 | 65391317  | A | 0.23 | A | 0.27 | A | 0.26 |
| 11 | <i>LRP4</i>     | rs3136441  | 46743247  | C | 0.18 | C | 0.04 | C | 0.03 |
| 11 | <i>MOGAT2</i>   | rs499974   | 75455021  | A | 0.19 | A | 0.40 | A | 0.34 |

|    |                 |            |           |   |      |   |      |   |      |
|----|-----------------|------------|-----------|---|------|---|------|---|------|
| 11 | <i>OR4C46</i>   | rs11246602 | 51512090  | C | 0.15 | C | 0.12 | C | 0.05 |
| 11 | <i>PHLDB1</i>   | rs11603023 | 118486067 | T | 0.42 | T | 0.45 | T | 0.48 |
| 11 | <i>SPTY2D1</i>  | rs10128711 | 18632984  | T | 0.3  | C | 0.30 | C | 0.20 |
| 11 | <i>ST3GAL4</i>  | rs11220462 | 126243952 | A | 0.14 | A | 0.04 | A | 0.04 |
| 11 | <i>UBASH3B</i>  | rs7941030  | 122522375 | C | 0.39 | C | 0.41 | C | 0.43 |
| 12 | <i>BRAP</i>     | rs11065987 | 112072424 | G | 0.41 | G | 0.09 | G | 0.07 |
| 12 | <i>HNFI1A</i>   | rs1169288  | 121416650 | C | 0.34 | C | 0.13 | C | 0.12 |
| 12 | <i>LRP1</i>     | rs11613352 | 57792580  | T | 0.26 | T | 0.14 | T | 0.09 |
| 12 | <i>MVK</i>      | rs7134594  | 110000193 | C | 0.48 | C | 0.33 | C | 0.26 |
| 12 | <i>PDE3A</i>    | rs7134375  | 20473758  | A | 0.43 | A | 0.36 | A | 0.29 |
| 12 | <i>PHC1</i>     | rs4883201  | 9082581   | G | 0.12 | G | 0.03 | G | 0.02 |
| 12 | <i>SBNO1</i>    | rs4759375  | 123796238 | T | 0.08 | T | 0.08 | T | 0.14 |
| 12 | <i>SCARB1</i>   | rs838880   | 125261593 | C | 0.34 | T | 0.35 | T | 0.33 |
| 12 | <i>ZNF664</i>   | rs4765127  | 124460167 | T | 0.35 | T | 0.35 | T | 0.36 |
| 13 | <i>BRCA2</i>    | rs4942486  | 32953388  | T | 0.48 | T | 0.48 | T | 0.49 |
| 14 | <i>NYNRIN</i>   | rs8017377  | 24883887  | A | 0.46 | A | 0.16 | A | 0.19 |
| 14 | <i>ZBTB42</i>   | rs4983559  | 105277209 | G | 0.4  | A | 0.39 | A | 0.42 |
| 15 | <i>CAPN3</i>    | rs2412710  | 42683787  | A | 0.04 | A | 0.06 | A | 0.07 |
| 15 | <i>FRMD5</i>    | rs2929282  | 44245931  | T | 0.07 | T | 0.31 | T | 0.31 |
| 15 | <i>LACTB</i>    | rs2652834  | 63396867  | A | 0.21 | A | 0.27 | A | 0.30 |
| 15 | <i>LIPC</i>     | rs1532085  | 58683366  | A | 0.4  | G | 0.48 | G | 0.46 |
| 16 | <i>CETP</i>     | rs3764261  | 56993324  | A | 0.32 | A | 0.31 | A | 0.31 |
| 16 | <i>CMIP</i>     | rs2925979  | 81534790  | T | 0.31 | T | 0.37 | T | 0.30 |
| 16 | <i>CTF1</i>     | rs11649653 | 30918487  | G | 0.4  | G | 0.11 | G | 0.09 |
| 16 | <i>FTO</i>      | rs1121980  | 53809247  | A | 0.43 | A | 0.49 | A | 0.45 |
| 16 | <i>HPR</i>      | rs2000999  | 72108093  | A | 0.2  | A | 0.08 | A | 0.07 |
| 16 | <i>LCAT</i>     | rs16942887 | 67928042  | A | 0.14 | A | 0.23 | A | 0.19 |
| 16 | <i>PDXDC1</i>   | rs3198697  | 15129940  | T | 0.43 | T | 0.09 | T | 0.06 |
| 17 | <i>ABCA8</i>    | rs4148008  | 66875294  | G | 0.33 | C | 0.43 | C | 0.46 |
| 17 | <i>APOH</i>     | rs1801689  | 64210580  | C | 0.04 | C | 0.00 | C | 0.01 |
| 17 | <i>DLG4</i>     | rs314253   | 7091650   | C | 0.37 | C | 0.32 | C | 0.39 |
| 17 | <i>MPP3</i>     | rs8077889  | 41878166  | C | 0.22 | C | 0.14 | C | 0.18 |
| 17 | <i>OSBPL7</i>   | rs7206971  | 45425115  | A | 0.49 | G | 0.56 | A | 0.46 |
| 17 | <i>PGS1</i>     | rs4129767  | 76403984  | G | 0.48 | A | 0.33 | A | 0.32 |
| 17 | <i>STARD3</i>   | rs11869286 | 37813856  | G | 0.35 | C | 0.34 | C | 0.23 |
| 18 | <i>LIPG</i>     | rs7241918  | 47160953  | G | 0.19 | G | 0.06 | G | 0.05 |
| 18 | <i>MC4R</i>     | rs12967135 | 57849023  | A | 0.25 | A | 0.26 | A | 0.27 |
| 19 | <i>ANGPTL4</i>  | rs7255436  | 8433196   | C | 0.47 | C | 0.36 | C | 0.31 |
| 19 | <i>APOE</i>     | rs439401   | 45414451  | T | N/A  | T | 0.16 | T | 0.19 |
| 19 | <i>APOE</i>     | rs4420638  | 45422946  | G | 0.19 | G | 0.29 | G | 0.19 |
| 19 | <i>CILP2</i>    | rs10401969 | 19407718  | C | 0.09 | C | 0.18 | C | 0.17 |
| 19 | <i>FUT2</i>     | rs492602   | 49206417  | G | 0.47 | A | 0.49 | A | 0.49 |
| 19 | <i>HAS1</i>     | rs17695224 | 52324216  | A | 0.26 | A | 0.16 | A | 0.16 |
| 19 | <i>INSR</i>     | rs7248104  | 7224431   | A | 0.42 | A | 0.26 | A | 0.30 |
| 19 | <i>LDLR</i>     | rs6511720  | 11202306  | T | 0.12 | T | 0.12 | T | 0.12 |
| 19 | <i>LILRA3</i>   | rs386000   | 54792761  | C | 0.26 | C | 0.20 | C | 0.16 |
| 19 | <i>LOC55908</i> | rs737337   | 11347493  | C | 0.11 | C | 0.40 | C | 0.45 |
| 19 | <i>PEPD</i>     | rs731839   | 33899065  | G | 0.35 | G | 0.43 | G | 0.38 |
| 20 | <i>ERGIC3</i>   | rs2277862  | 34152782  | T | 0.15 | T | 0.16 | T | 0.20 |
| 20 | <i>HNFA4</i>    | rs1800961  | 43042364  | T | 0.05 | T | 0.00 | T | 0.01 |
| 20 | <i>MAFB</i>     | rs2902940  | 39091487  | G | 0.3  | G | 0.42 | G | 0.48 |
| 20 | <i>PLTP</i>     | rs6065906  | 44554015  | C | 0.19 | C | 0.16 | C | 0.14 |
| 20 | <i>SNX5</i>     | rs2328223  | 17845921  | C | 0.21 | C | 0.10 | C | 0.22 |

|    |               |           |          |   |      |   |      |   |      |
|----|---------------|-----------|----------|---|------|---|------|---|------|
| 20 | <i>SPTLC3</i> | rs364585  | 12962718 | A | 0.38 | A | 0.15 | A | 0.16 |
| 20 | <i>TOP1</i>   | rs6029526 | 39672618 | A | 0.47 | T | 0.19 | T | 0.24 |
| 22 | <i>MTMR3</i>  | rs5763662 | 30378703 | T | 0.04 | T | 0.02 | T | 0.01 |
| 22 | <i>PLA2G6</i> | rs5756931 | 38546033 | C | 0.4  | C | 0.11 | C | 0.11 |
| 22 | <i>PPARA</i>  | rs4253772 | 46627603 | T | 0.11 | T | 0.01 | T | 0.02 |
| 22 | <i>TOM1</i>   | rs138777  | 35711098 | A | 0.36 | G | 0.32 | G | 0.19 |
| 22 | <i>UBE2L3</i> | rs181362  | 21932068 | T | 0.23 | T | 0.40 | T | 0.42 |

\*Chr= Chromosome; Allele frequencies for populations acquired from 1,000 genomes project build 37; GWAS = genome wide association study; MAF = minor allele frequency; ASW= African Ancestry in Southwest US; EArep = European Ancestry replication study; ASW is the U.S. representative populations in 1,000 genomes for African Americans ([http://grch37.ensembl.org/Homo\\_sapiens/Info/Index?db=core;r=1:178514812-178515812;v=rs4650994;vdb=variation;vf=2817147](http://grch37.ensembl.org/Homo_sapiens/Info/Index?db=core;r=1:178514812-178515812;v=rs4650994;vdb=variation;vf=2817147)).

Supplementary Table 2. M-values of 66 DNAm sites examined

| Chr | Gene            | DNAm site  | Position  | Mean M-Value | SD of Mean M-value |
|-----|-----------------|------------|-----------|--------------|--------------------|
| 1   | <i>EVI5</i>     | cg00519208 | 93030907  | 0.767        | 0.051              |
| 1   | <i>EVI5</i>     | cg10989326 | 93031496  | 0.692        | 0.045              |
| 1   | <i>GALNT2</i>   | cg04702490 | 228269053 | 0.042        | 0.026              |
| 1   | <i>GALNT2</i>   | cg13769204 | 228270234 | 0.042        | 0.019              |
| 1   | <i>PABPC4</i>   | cg08866753 | 39814648  | 0.031        | 0.006              |
| 1   | <i>PABPC4</i>   | cg12585282 | 39815314  | 0.096        | 0.041              |
| 2   | <i>APOB</i>     | cg05337441 | 21120073  | 0.227        | 0.094              |
| 2   | <i>APOB</i>     | cg24309555 | 21120461  | 0.398        | 0.124              |
| 2   | <i>GCKR</i>     | cg20022122 | 27573626  | 0.800        | 0.036              |
| 2   | <i>GCKR</i>     | cg20229788 | 27572002  | 0.155        | 0.032              |
| 2   | <i>RAB3GAP1</i> | cg12813922 | 135526410 | 0.023        | 0.006              |
| 2   | <i>RAB3GAP1</i> | cg18312807 | 135526163 | 0.048        | 0.010              |
| 3   | <i>RAF1</i>     | cg09326546 | 12680291  | 0.037        | 0.027              |
| 3   | <i>RAF1</i>     | cg18331396 | 12680704  | 0.038        | 0.008              |
| 4   | <i>SLC39A8</i>  | cg04304927 | 103485577 | 0.027        | 0.020              |
| 4   | <i>SLC39A8</i>  | cg18277508 | 103485368 | 0.109        | 0.024              |
| 5   | <i>HMGCR</i>    | cg02162412 | 74668682  | 0.029        | 0.023              |
| 5   | <i>TIMD4</i>    | cg18994063 | 156322277 | 0.711        | 0.038              |
| 6   | <i>FRK</i>      | cg00430287 | 116489569 | 0.930        | 0.011              |
| 6   | <i>FRK</i>      | cg16176600 | 116488302 | 0.785        | 0.052              |
| 6   | <i>HFE</i>      | cg06892726 | 26195586  | 0.142        | 0.026              |
| 6   | <i>HLA-DRA</i>  | cg19248557 | 32515816  | 0.053        | 0.012              |
| 6   | <i>HLA-DRA</i>  | cg25764570 | 32515267  | 0.558        | 0.071              |
| 7   | <i>NPC1L1</i>   | cg14477619 | 44547406  | 0.861        | 0.024              |
| 7   | <i>NPC1L1</i>   | cg17754680 | 44548356  | 0.721        | 0.065              |
| 8   | <i>PINX1</i>    | cg11108432 | 10735108  | 0.041        | 0.024              |
| 8   | <i>TRPS1</i>    | cg12569516 | 116750367 | 0.045        | 0.007              |
| 8   | <i>TRPS1</i>    | cg21312090 | 116750901 | 0.113        | 0.085              |
| 9   | <i>ABCA1</i>    | cg05286874 | 106730306 | 0.028        | 0.012              |
| 9   | <i>ABCA1</i>    | cg21572316 | 106729839 | 0.088        | 0.020              |
| 10  | <i>GPAM</i>     | cg12137206 | 113933387 | 0.088        | 0.016              |
| 10  | <i>GPAM</i>     | cg24965984 | 113933713 | 0.151        | 0.048              |
| 10  | <i>JMJD1C</i>   | cg22492966 | 64698935  | 0.105        | 0.019              |
| 11  | <i>FADS1</i>    | cg09462826 | 61341349  | 0.100        | 0.017              |
| 11  | <i>FADS1</i>    | cg27173322 | 61340688  | 0.027        | 0.025              |
| 11  | <i>ST3GAL4</i>  | cg01234063 | 125731217 | 0.081        | 0.017              |
| 11  | <i>ST3GAL4</i>  | cg08203715 | 125731364 | 0.091        | 0.018              |
| 12  | <i>SBNO1</i>    | cg04398275 | 122400770 | 0.780        | 0.036              |
| 12  | <i>SBNO1</i>    | cg16068780 | 122401376 | 0.878        | 0.023              |
| 12  | <i>ZNF664</i>   | cg02252918 | 123024395 | 0.024        | 0.016              |
| 12  | <i>ZNF664</i>   | cg26493932 | 123022544 | 0.058        | 0.012              |

|    |                |            |          |       |       |
|----|----------------|------------|----------|-------|-------|
| 15 | <i>CAPN3</i>   | cg19170321 | 40427608 | 0.856 | 0.021 |
| 15 | <i>CAPN3</i>   | cg23414431 | 40427575 | 0.864 | 0.021 |
| 15 | <i>FRMD5</i>   | cg16046465 | 42274484 | 0.063 | 0.057 |
| 15 | <i>FRMD5</i>   | cg23074453 | 42275216 | 0.110 | 0.025 |
| 16 | <i>HPR</i>     | cg09584711 | 70654445 | 0.519 | 0.073 |
| 16 | <i>HPR</i>     | cg20672044 | 70653999 | 0.916 | 0.016 |
| 17 | <i>ABCA8</i>   | cg21660392 | 64462140 | 0.898 | 0.039 |
| 17 | <i>STARD3</i>  | cg14115004 | 35046738 | 0.082 | 0.031 |
| 17 | <i>STARD3</i>  | cg23894539 | 35047044 | 0.025 | 0.016 |
| 19 | <i>ANGPTL4</i> | cg02505409 | 8335160  | 0.041 | 0.026 |
| 19 | <i>ANGPTL4</i> | cg16745616 | 8334856  | 0.113 | 0.026 |
| 19 | <i>FUT2</i>    | cg01656853 | 53890984 | 0.413 | 0.047 |
| 19 | <i>FUT2</i>    | cg19025034 | 53890712 | 0.855 | 0.018 |
| 19 | <i>LDLR</i>    | cg05249393 | 11060883 | 0.095 | 0.018 |
| 19 | <i>LDLR</i>    | cg23943360 | 11061146 | 0.051 | 0.011 |
| 20 | <i>ERGIC3</i>  | cg00340102 | 33592870 | 0.255 | 0.042 |
| 20 | <i>ERGIC3</i>  | cg00350702 | 33593341 | 0.063 | 0.012 |
| 20 | <i>HNF4A</i>   | cg19717150 | 42418292 | 0.741 | 0.056 |
| 20 | <i>HNF4A</i>   | cg23834593 | 42417334 | 0.751 | 0.046 |
| 20 | <i>TOP1</i>    | cg04119538 | 39090865 | 0.042 | 0.019 |
| 20 | <i>TOP1</i>    | cg16376234 | 39090920 | 0.072 | 0.015 |
| 22 | <i>PLA2G6</i>  | cg04280397 | 36908084 | 0.067 | 0.011 |
| 22 | <i>PLA2G6</i>  | cg10184886 | 36907524 | 0.211 | 0.045 |
| 22 | <i>UBE2L3</i>  | cg25421647 | 20251833 | 0.140 | 0.054 |
| 22 | <i>UBE2L3</i>  | cg26286036 | 20252412 | 0.044 | 0.008 |

\*Chr= Chromosome; Map locations based on Illumina Infinium annotation file for the 27K array build 36 (<https://support.illumina.com/array/downloads.html>)
